# Supplementary material
Source: Springer Nature journal article supplement (https://www.springermedizin.de/resource/supplementary/13019_2014_1477_MOESM1_ESM.pdf/9640526)

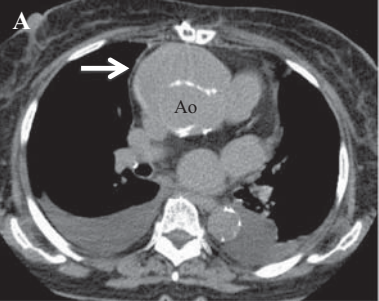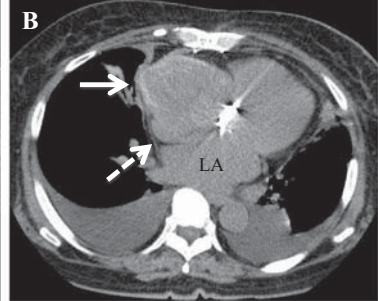

Supplement: MOESM1 [file 9640526]
